# Supplementary material for: Acquired Triazole Resistance Alters Pathogenicity-Associated Features in Candida auris in an Isolate-Dependent Manner
Source: MDPI journal article supplement (doi:10.3390/jof9121148), 2023-11-28
Supplement: s1 [file s1]

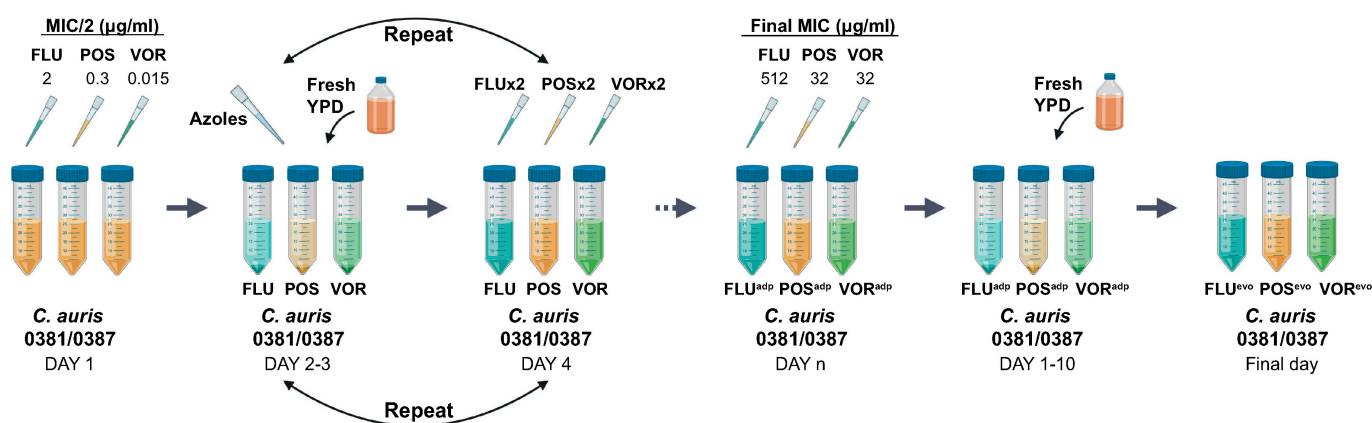

**Figure S1. *In vitro* microevolution process.**

Scheme of the *in vitro* microevolution process applied to generate the triazole resistant *C. auris* strains derived from the azole susceptible clinical isolates 0381 and 0387. FLU: fluconazole; POS: posaconazole; VOR: voriconazole.

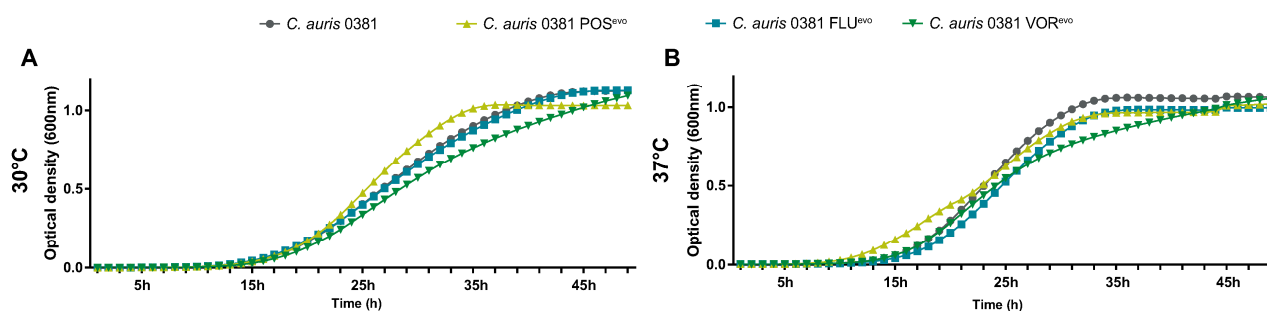

**Figure S2. Growth kinetics of the generated strains compared to the parental isolates in complex media (YPD).**

**(A)** Growth curve of the *C. auris* 0381 clinical isolate and the evolved strains at 30°C; **(B)** Growth curve of the *C. auris* 0381 clinical isolate and the evolved strains at 37°C. Growth curves represent the means of at least 30 data points from three independent experiments.

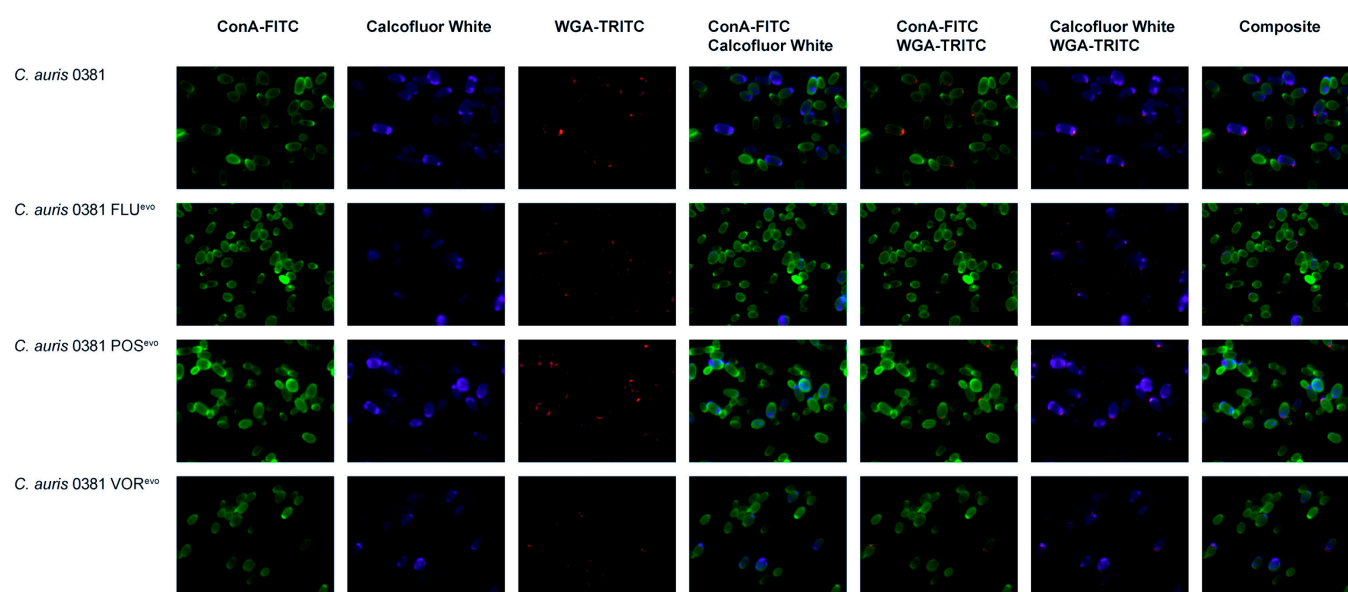

**Figure S3.** Fluorescence microscopic analysis of the cell-wall components of the 0381 isolate derived strains

Alpha-mannan content of the cell wall was determined by staining with ConA-FITC; chitin was stained by Calcofluor white, and chitin oligomer content was detected using WGA-TRITC. ConA: FITC conjugated Concavalin-A; WGA: TRITC conjugated Wheat Germ Agglutinin.

**Table S1.** Initial and final antifungal concentrations for the *in vitro* microevolution experiment

Antifungal drug concentrations used during the microevolution process. Initial concentrations for each antifungal were established as half of the MIC values determined for the clinical isolates. Final drug concentrations were chosen to confidently determine resistance.

| Strains                                 | Growth rate |       | Inflection point |      |
|-----------------------------------------|-------------|-------|------------------|------|
|                                         | 30°C        | 37°C  | 30°C             | 37°C |
| <i>C. auris</i> 0381                    | 0.218       | 0.355 | 25.3             | 19.8 |
| <i>C. auris</i> 0381 FLU <sup>evo</sup> | 0.198       | 0.314 | 26.0             | 21.4 |
| <i>C. auris</i> 0381 POS <sup>evo</sup> | 0.300       | 0.416 | 23.0             | 22.2 |
| <i>C. auris</i> 0381 VOR <sup>evo</sup> | 0.198       | 0.254 | 27.5             | 27.2 |
| <i>C. auris</i> 0387                    | 0.220       | 0.508 | 31.2             | 21.0 |
| <i>C. auris</i> 0387 FLU <sup>evo</sup> | 0.304       | 0.403 | 18.2             | 15.0 |
| <i>C. auris</i> 0387 POS <sup>evo</sup> | 0.350       | 0.468 | 17.9             | 13.8 |
| <i>C. auris</i> 0387 VOR <sup>evo</sup> | 0.371       | 0.558 | 17.8             | 13.9 |

**Table S2. Growth curve analysis of the clinical isolates and evolved strains**

Growing capacity of the evolved strains was monitored in complex media (YPD). Optical density (OD<sub>600nm</sub>) values were registered, and the subsequent growth curves were analyzed in R environment, using ‘Growthcurver’ package.

| <i>m/z</i> | 379,337                           | 381,352                                | 383,368                           | 391,337                           | 393,353                           | 395,332                                        | 395,368                           | 407,368                           | 409,383                           | 411,363                                        | 423,399                           | 425,380                                        |          |
|------------|-----------------------------------|----------------------------------------|-----------------------------------|-----------------------------------|-----------------------------------|------------------------------------------------|-----------------------------------|-----------------------------------|-----------------------------------|------------------------------------------------|-----------------------------------|------------------------------------------------|----------|
| tR (min)   | 6,1                               | 6,46                                   | 6,78                              | 5,48                              | 4,24                              | 6,4                                            | 6,27                              | 4,55                              | 6,83                              | 4,29                                           | 7,06                              | 4,54                                           |          |
| Sample     | Ergosterole                       | Fecos-terol/Epi-sterol/Er-gostadi-enol | Ergosta-enol                      | ?                                 | ?                                 | ?                                              | 14-Me-fe-costerol                 | ?                                 | Lanos-terol/Ob-tusifoliol         | 14-Me-er-gosta-dien-diol                       | Eburicol                          | ?                                              |          |
|            | C <sub>28</sub> H <sub>44</sub> O | C <sub>28</sub> H <sub>46</sub> O      | C <sub>28</sub> H <sub>48</sub> O | C <sub>29</sub> H <sub>44</sub> O | C <sub>29</sub> H <sub>46</sub> O | C <sub>28</sub> H <sub>44</sub> O <sub>2</sub> | C <sub>29</sub> H <sub>48</sub> O | C <sub>30</sub> H <sub>48</sub> O | C <sub>30</sub> H <sub>50</sub> O | C <sub>29</sub> H <sub>48</sub> O <sub>2</sub> | C <sub>31</sub> H <sub>52</sub> O | C <sub>30</sub> H <sub>50</sub> O <sub>2</sub> | SUM      |
| 1          | 1,85E+10                          | 3,21E+08                               | 1,93E+07                          | 0                                 | 0                                 | 0                                              | 0                                 | 1,37E+07                          | 3,87E+08                          | 0                                              | 0                                 |                                                | 1,93E+10 |
| 2          | 1,96E+10                          | 2,96E+08                               | 1,74E+07                          | 0                                 | 0                                 | 0                                              | 0                                 | 1,37E+07                          | 4,07E+08                          | 0                                              | 0                                 |                                                | 2,03E+10 |
| 3          | 1,77E+10                          | 2,80E+08                               | 1,23E+07                          | 0                                 | 0                                 | 0                                              | 0                                 | 1,37E+07                          | 3,84E+08                          | 0                                              | 0                                 |                                                | 1,83E+10 |
| 4          | 3,96E+09                          | 2,01E+07                               | 0                                 | 3,32E+07                          | 9,74E+08                          | 0                                              | 3,33E+09                          | 1,19E+07                          | 1,31E+10                          | 1,71E+09                                       | 9,98E+08                          | 1,79E+08                                       | 2,43E+10 |
| 5          | 3,97E+09                          | 2,02E+07                               | 0                                 | 4,19E+07                          | 1,88E+09                          | 0                                              | 3,88E+09                          | 6,79E+07                          | 1,49E+10                          | 3,43E+09                                       | 1,09E+09                          | 2,30E+08                                       | 2,96E+10 |
| 6          | 3,85E+09                          | 2,07E+07                               | 0                                 | 3,47E+07                          | 1,14E+09                          | 0                                              | 2,87E+09                          | 4,65E+07                          | 9,93E+09                          | 2,07E+09                                       | 9,11E+08                          | 1,90E+08                                       | 2,11E+10 |
| 7          | 5,09E+09                          | 2,26E+07                               | 0                                 | 4,16E+07                          | 9,71E+08                          | 0                                              | 3,54E+09                          |                                   | 1,25E+10                          | 1,77E+09                                       | 8,20E+08                          | 3,98E+08                                       | 2,51E+10 |
| 8          | 4,57E+09                          | 1,76E+07                               | 0                                 | 3,70E+07                          | 8,84E+08                          | 0                                              | 3,99E+09                          |                                   | 1,50E+10                          | 1,59E+09                                       | 8,46E+08                          | 4,53E+08                                       | 2,74E+10 |
| 9          | 4,40E+09                          | 1,66E+07                               | 0                                 | 3,09E+07                          | 7,22E+08                          | 0                                              | 3,95E+09                          |                                   | 1,38E+10                          | 1,28E+09                                       | 7,53E+08                          | 3,67E+08                                       | 2,53E+10 |
| 10         | 4,23E+09                          | 8,67E+06                               | 0                                 | 6,63E+07                          | 7,75E+08                          | 0                                              | 3,23E+09                          |                                   | 1,28E+10                          | 1,41E+09                                       | 1,11E+09                          | 1,24E+08                                       | 2,37E+10 |
| 11         | 4,50E+09                          | 8,44E+06                               | 0                                 | 9,59E+07                          | 1,04E+09                          | 0                                              | 3,01E+09                          |                                   | 1,15E+10                          | 1,86E+09                                       | 1,13E+09                          | 1,53E+08                                       | 2,33E+10 |
| 12         | 4,81E+09                          | 1,16E+07                               | 0                                 | 7,64E+07                          | 9,29E+08                          | 0                                              | 3,29E+09                          |                                   | 1,18E+10                          | 1,68E+09                                       | 1,21E+09                          | 1,52E+08                                       | 2,40E+10 |
| 13         | 1,78E+10                          | 2,43E+08                               | 3,92E+07                          | 0                                 | 0                                 | 0                                              | 3,07E+07                          | 1,17E+07                          | 3,94E+08                          | 0                                              | 0                                 |                                                | 1,86E+10 |
| 14         | 1,75E+10                          | 2,26E+08                               | 3,48E+07                          | 0                                 | 0                                 | 0                                              | 1,26E+07                          | 1,34E+07                          | 4,39E+08                          | 0                                              | 0                                 |                                                | 1,82E+10 |
| 15         | 1,90E+10                          | 2,97E+08                               | 3,81E+07                          | 0                                 | 0                                 | 0                                              | 1,94E+07                          | 1,22E+07                          | 4,16E+08                          | 0                                              | 0                                 |                                                | 1,98E+10 |
| 16         | 1,02E+10                          | 1,60E+08                               | 3,65E+07                          | 1,05E+08                          | 5,10E+08                          | 0                                              | 2,29E+09                          | 5,79E+08                          | 8,51E+09                          | 1,46E+09                                       | 4,59E+08                          | 1,04E+09                                       | 2,53E+10 |
| 17         | 1,01E+10                          | 1,33E+08                               | 1,86E+07                          | 1,10E+08                          | 5,62E+08                          | 0                                              | 2,23E+09                          | 5,79E+08                          | 7,94E+09                          | 1,52E+09                                       | 4,30E+08                          | 1,04E+09                                       | 2,46E+10 |
| 18         | 1,12E+10                          | 1,28E+08                               | 1,51E+07                          | 1,29E+08                          | 7,18E+08                          | 0                                              | 2,56E+09                          | 7,15E+08                          | 9,14E+09                          | 1,99E+09                                       | 4,78E+08                          | 1,27E+09                                       | 2,84E+10 |
| 19         | 3,93E+09                          | 1,07E+10                               | 2,75E+09                          | 0                                 | 0                                 | 1,91E+08                                       | 0                                 |                                   | 1,36E+08                          | 0                                              | 0                                 |                                                | 1,77E+10 |
| 20         | 4,04E+09                          | 1,12E+10                               | 2,60E+09                          | 0                                 | 0                                 | 1,96E+09                                       | 0                                 |                                   | 1,36E+08                          | 0                                              | 0                                 |                                                | 2,00E+10 |
| 21         | 3,09E+09                          | 7,42E+09                               | 1,57E+09                          | 0                                 | 0                                 | 1,42E+08                                       | 0                                 |                                   | 3,59E+08                          | 0                                              | 0                                 |                                                | 1,26E+10 |
| 22         | 2,92E+08                          | 2,83E+08                               | 1,85E+07                          | 1,15E+07                          | 8,99E+07                          | 0                                              | 1,11E+10                          | 1,73E+08                          | 1,32E+10                          | 2,18E+08                                       | 8,27E+08                          | 1,05E+09                                       | 2,73E+10 |
| 23         | 3,35E+08                          | 3,07E+08                               | 1,84E+07                          | 1,24E+07                          | 1,01E+08                          | 0                                              | 1,25E+10                          | 1,84E+08                          | 1,34E+10                          | 2,41E+08                                       | 9,07E+08                          | 1,11E+09                                       | 2,91E+10 |
| 24         | 3,08E+08                          | 3,15E+08                               | 1,85E+07                          | 1,37E+07                          | 1,07E+08                          | 0                                              | 1,28E+10                          | 1,80E+08                          | 1,31E+10                          | 2,54E+08                                       | 8,56E+08                          | 1,10E+09                                       | 2,90E+10 |
| 25         | 1,25E+10                          | 1,32E+08                               | 1,51E+07                          | 0                                 | 0                                 | 0                                              | 0                                 |                                   | 1,05E+08                          | 0                                              | 0                                 |                                                | 1,28E+10 |
| 26         | 1,32E+10                          | 1,43E+08                               | 1,82E+07                          | 0                                 | 0                                 | 0                                              | 0                                 |                                   | 1,12E+08                          | 0                                              | 0                                 |                                                | 1,35E+10 |
| 27         | 1,40E+10                          | 1,58E+08                               | 1,79E+07                          | 0                                 | 0                                 | 0                                              | 0                                 |                                   | 1,21E+08                          | 0                                              | 0                                 |                                                | 1,43E+10 |

0381 wt

0381 wt FLU

0381 wt POS

0381 wt

VOR

0381 FLU

0381 FLU

FLU

0381 POS

0381 POS

POS

0381 VOR

|    |          |          |          |          |          |          |          |          |          |          |          |          |          |                 |
|----|----------|----------|----------|----------|----------|----------|----------|----------|----------|----------|----------|----------|----------|-----------------|
| 28 | 4,01E+09 | 4,03E+08 | 3,35E+07 | 1,14E+08 | 8,36E+08 | 0        | 4,11E+09 | 4,17E+08 | 1,39E+10 | 1,76E+09 | 5,99E+08 | 1,08E+09 | 2,73E+10 | 0381 VOR<br>VOR |
| 29 | 4,53E+09 | 4,15E+08 | 2,88E+07 | 1,24E+08 | 8,56E+08 | 0        | 4,41E+09 | 4,61E+08 | 1,57E+10 | 2,02E+09 | 6,58E+08 | 1,19E+09 | 3,04E+10 |                 |
| 30 | 3,52E+09 | 3,24E+08 | 3,00E+07 | 9,90E+07 | 6,89E+08 | 0        | 3,35E+09 | 3,53E+08 | 1,20E+10 | 1,56E+09 | 4,95E+08 | 9,17E+08 | 2,34E+10 |                 |
| 31 | 1,36E+10 | 3,17E+08 | 1,12E+07 | 0        | 0        | 0        | 2,72E+06 |          | 2,59E+08 | 0        | 1,69E+07 |          | 1,42E+10 | 0387 wt         |
| 32 | 1,62E+10 | 3,53E+08 | 1,33E+07 | 0        | 0        | 0        | 5,59E+06 |          | 2,89E+08 | 0        | 1,16E+07 |          | 1,69E+10 |                 |
| 33 | 1,55E+10 | 3,26E+08 | 1,09E+07 | 0        | 0        | 0        | 5,15E+06 |          | 2,64E+08 | 0        | 1,07E+07 |          | 1,61E+10 |                 |
| 34 | 4,65E+09 | 3,14E+07 | 0        | 2,84E+07 | 1,11E+09 | 0        | 2,03E+09 |          | 5,46E+09 | 2,02E+09 | 9,92E+08 | 8,98E+07 | 1,64E+10 | 0387 wt FLU     |
| 35 | 4,28E+09 | 2,78E+07 | 0        | 2,58E+07 | 1,02E+09 | 0        | 1,98E+09 |          | 5,23E+09 | 1,86E+09 | 9,63E+08 | 8,68E+07 | 1,55E+10 |                 |
| 36 | 4,67E+09 | 2,89E+07 | 0        | 2,80E+07 | 1,13E+09 | 0        | 2,12E+09 |          | 5,63E+09 | 2,09E+09 | 1,03E+09 | 9,42E+07 | 1,68E+10 |                 |
| 37 | 4,35E+09 | 2,16E+07 | 0        | 2,88E+07 | 8,45E+08 | 0        | 2,14E+09 |          | 5,96E+09 | 1,58E+09 | 8,10E+08 | 7,96E+07 | 1,58E+10 | 0387 wt POS     |
| 38 | 4,61E+09 | 2,49E+07 | 0        | 3,49E+07 | 1,02E+09 | 0        | 2,45E+09 |          | 6,33E+09 | 1,88E+09 | 8,86E+08 | 9,42E+07 | 1,73E+10 |                 |
| 39 | 3,99E+09 | 2,19E+07 | 0        | 3,06E+07 | 9,87E+08 | 0        | 2,02E+09 |          | 5,69E+09 | 1,77E+09 | 7,85E+08 | 1,24E+08 | 1,54E+10 |                 |
| 40 | 4,58E+09 | 1,31E+07 | 0        | 4,94E+07 | 8,63E+08 | 0        | 1,96E+09 |          | 5,30E+09 | 1,58E+09 | 1,03E+09 | 6,23E+07 | 1,54E+10 | 0387 wt<br>VOR  |
| 41 | 4,37E+09 | 1,66E+07 | 0        | 5,74E+07 | 8,64E+08 | 0        | 2,76E+09 |          | 6,74E+09 | 1,61E+09 | 9,25E+08 |          | 1,73E+10 |                 |
| 42 | 4,02E+09 | 1,50E+07 | 0        | 5,49E+07 | 9,81E+08 | 0        | 2,92E+09 |          | 7,21E+09 | 1,75E+09 | 1,01E+09 |          | 1,80E+10 |                 |
| 43 | 1,90E+10 | 3,51E+08 | 0        | 0        | 0        | 0        | 0        |          | 1,50E+08 | 0        | 0        |          | 1,95E+10 | 0387 FLU        |
| 44 | 1,84E+10 | 3,23E+08 | 0        | 0        | 0        | 0        | 0        |          | 1,48E+08 | 0        | 0        |          | 1,89E+10 |                 |
| 45 | 2,01E+10 | 3,32E+08 | 0        | 0        | 0        | 0        | 0        |          | 1,58E+08 | 0        | 0        |          | 2,06E+10 |                 |
| 46 | 5,31E+08 | 0        | 0        | 4,57E+07 | 1,60E+09 | 0        | 7,39E+09 |          | 1,85E+10 | 2,95E+09 | 1,51E+09 | 7,70E+08 | 3,33E+10 | 0387 FLU<br>FLU |
| 47 | 4,77E+08 | 0        | 0        | 4,14E+07 | 1,35E+09 | 0        | 6,16E+09 |          | 1,59E+10 | 2,50E+09 | 1,45E+09 | 6,44E+08 | 2,85E+10 |                 |
| 48 | 5,75E+08 | 0        | 0        | 4,65E+07 | 1,89E+09 | 0        | 7,64E+09 |          | 1,89E+10 | 3,45E+09 | 1,71E+09 | 8,03E+08 | 3,50E+10 |                 |
| 49 | 2,46E+07 | 1,19E+10 | 6,71E+08 | 0        | 0        | 5,04E+08 | 0        |          | 1,10E+08 | 0        | 0        |          | 1,33E+10 | 0387 POS        |
| 50 | 2,96E+07 | 1,39E+10 | 7,03E+08 | 0        | 0        | 5,60E+08 | 0        |          | 1,37E+08 | 0        | 0        |          | 1,53E+10 |                 |
| 51 | 3,16E+07 | 1,25E+10 | 8,15E+08 | 0        | 0        | 5,51E+08 | 0        |          | 1,34E+08 | 0        | 0        |          | 1,40E+10 |                 |
| 52 | 0        | 4,36E+08 | 1,17E+07 | 0        | 0        | 0        | 1,47E+10 |          | 1,27E+10 | 0        | 1,50E+09 | 5,45E+08 | 3,00E+10 | 0387 POS<br>POS |
| 53 | 0        | 4,23E+08 | 6,76E+06 | 0        | 0        | 0        | 1,60E+10 |          | 1,24E+10 | 0        | 1,65E+09 | 5,46E+08 | 3,10E+10 |                 |
| 54 | 0        | 3,90E+08 | 4,32E+06 | 0        | 0        | 0        | 1,37E+10 |          | 1,09E+10 | 0        | 1,63E+09 | 2,92E+08 | 2,70E+10 |                 |
| 55 | 2,43E+08 | 1,57E+10 | 7,17E+08 | 0        | 0        | 4,53E+08 | 2,27E+07 |          | 1,90E+08 | 0        | 1,66E+07 |          | 1,73E+10 | 0387 VOR        |
| 56 | 2,33E+08 | 1,28E+10 | 6,91E+08 | 0        | 0        | 4,04E+08 | 3,13E+06 |          | 1,11E+08 | 0        | 2,36E+06 |          | 1,42E+10 |                 |
| 57 | 0,00E+00 | 1,42E+10 | 1,04E+09 | 0        | 0        | 4,02E+08 | 4,31E+06 |          | 1,30E+08 | 0        | 3,66E+06 |          | 1,58E+10 |                 |
| 58 | 0        | 4,51E+08 | 3,64E+06 | 0        | 0        | 0        | 1,35E+10 |          | 1,18E+10 | 0        | 2,62E+09 | 1,52E+08 | 2,85E+10 | 0387 VOR<br>VOR |
| 59 | 0        | 3,78E+08 | 2,70E+06 | 0        | 0        | 0        | 1,16E+10 |          | 1,01E+10 | 0        | 2,25E+09 | 1,25E+08 | 2,45E+10 |                 |
| 60 | 0        | 4,45E+08 | 4,41E+06 | 0        | 0        | 0        | 1,39E+10 |          | 1,06E+10 | 0        | 2,37E+09 | 1,31E+08 | 2,75E+10 |                 |

**Table S3. Orthologs of the selected efflux pump coding genes and primers used in this study**

(A) List of primer sequences used for the RT-qPCR; (B) Orthologous genes of the efflux pumps selected for RT-qPCR based expression analysis

**A**

|              | Forward primer (5'-3') | Reverse primer (5'-3') |
|--------------|------------------------|------------------------|
| <b>ACT1</b>  | GAAGGAGATCACTGCTTTAGCC | CTGTGTGGATTGGTGGCTC    |
| <b>CDR1</b>  | GGGCTGGAAGTGCAAGATTCC  | CATCAAGCAAGTAGCCACCG   |
| <b>SNQ2a</b> | GATGTTCAATCAGCTGCGGTG  | GGCATCAAGCTCACAGGTTGA  |
| <b>SNQ2b</b> | GGCAATTTCAACACGCCGCTG  | GGGCGTCTCCTTCGAAGACC   |
| <b>MDR1</b>  | GAGAGACGAGCCCCAGCC     | GGCACCCGCCATCATACTTC   |
| <b>TPO3</b>  | GCCAGACATCAACATGCCTCC  | GAGAATCGGGCGTGTGAAGT   |

**B**

|                         | <b>C. auris</b> Systematic Name | <b>S. cerevisiae</b> ortholog | <b>C. albicans</b> ortholog | <b>C. glabrata</b> ortholog |
|-------------------------|---------------------------------|-------------------------------|-----------------------------|-----------------------------|
| <b>ABC transporters</b> |                                 |                               |                             |                             |
| <b>CDR1</b>             | B9J08_000164                    | PDR5                          | CDR1                        | PDH1                        |
| <b>CDR6</b>             | B9J08_005430                    | YOLO75C                       | ROA1                        | CAGL0I08019g                |
| <b>SNQ2a</b>            | B9J08_001125                    | SNQ2                          | SNQ2<br>(orf19.5759)        | SNQ2<br>(orf19.5759)        |
| <b>SNQ2b</b>            | B9J08_004452                    | SNQ2                          | SNQ2<br>(orf19.5759)        | SNQ2<br>(CAGL0I04862g)      |
|                         |                                 |                               |                             |                             |
| <b>MFS transporters</b> |                                 |                               |                             |                             |
| <b>MDR1</b>             | B9J08_003981                    | FLR1                          | MDR1                        | FLR1                        |
| <b>TPO3</b>             | B9J08_004775                    | TPO2                          | TPO3                        | TPO3                        |

**Table S4. LC-HRMS data of the sterol composition of the clinical isolates and evolved strains**

Raw LC-HRMS data registered for the three technical parallels of each strain.

|                           | <b>C. auris 0381 (B11220)</b>      |                                  | <b>C. auris 0387 (B8441)</b>       |                                  |
|---------------------------|------------------------------------|----------------------------------|------------------------------------|----------------------------------|
|                           | Initial drug concentration (µg/ml) | Final drug concentration (µg/ml) | Initial drug concentration (µg/ml) | Final drug concentration (µg/ml) |
| <b>Fluconazole (FLU)</b>  | 2                                  | 512                              | 2                                  | 512                              |
| <b>Posaconazole (POS)</b> | 0.03                               | 32                               | 0.125                              | 32                               |
| <b>Voriconazole (VOR)</b> | 0.015                              | 32                               | 0.015                              | 32                               |

**Table S5. Rapamycin MIC values**

For the 0387 evolved strains MIC values of rapamycin were determined at 80% growth arrest after 24h, 36h and 48h at both 30°C and 37°C.

| Strains                                | MIC (ng/ml) |       |       |       |       |       |
|----------------------------------------|-------------|-------|-------|-------|-------|-------|
|                                        | 24h         |       | 36h   |       | 48h   |       |
|                                        | 30°C        | 37°C  | 30°C  | 37°C  | 30°C  | 37°C  |
| <b>C. auris 0387</b>                   | 4,23        | 1,63  | 18,23 | 7,16  | 41,67 | 14,32 |
| <b>C. auris 0387 FLU<sup>evo</sup></b> | 187,50      | 250   | >500  | >500  | >500  | >500  |
| <b>C. auris 0387 POS<sup>evo</sup></b> | 36,46       | 15,63 | 52,08 | 20,83 | 62,50 | 31,25 |
| <b>C. auris 0387 VOR<sup>evo</sup></b> | 5,86        | 5,86  | 52,08 | 18,23 | 62,50 | 20,83 |
